# Supplementary material
Source: PubMed Central journal article supplement (PMC10044467)
Supplement: NIHMS1881012-supplement-Supplement_Tables.pdf [file NIHMS1881012-supplement-Supplement_Tables.pdf]

**Supplementary Table 1. Control Diet Nutrient Profile**

**Purina Mills #5038: Monkey Diet**

| <b>Nitrogen-Free Extract</b>      |  | <b>59.30%</b>        | <b>Minerals</b>            |               |         |
|-----------------------------------|--|----------------------|----------------------------|---------------|---------|
| Starch                            |  | 42.40%               | Ash                        | 5.30%         |         |
| Glucose                           |  | 0.29%                | Calcium                    | 0.90%         |         |
| Fructose                          |  | 0.32%                | Phosphorus                 | 0.60%         |         |
| Sucrose                           |  | 2.24%                | Phosphorus (non-phytate)   | 0.34%         |         |
| Lactose                           |  | 1.68%                | Potassium                  | 0.72%         |         |
| <b>Fat (ether extract)</b>        |  |                      | <b>5%</b>                  | Magnesium     | 0.18%   |
| <b>Fat (acid hydrolysis)</b>      |  |                      | <b>6%</b>                  | Sulfur        | 0.23%   |
| Linoleic acid                     |  | 1.66%                | Sodium                     | 0.25%         |         |
| Linolenic Acid                    |  | 0.10%                | Chlorine                   | 0.40%         |         |
| Arachidonic Acid                  |  | <0.01%               | Fluorine                   | 19 ppm        |         |
| Omega-3 FA                        |  | 0.13%                | Iron                       | 230 ppm       |         |
| Total Saturated FA                |  | 1.54%                | Manganese                  | 100 ppm       |         |
| Total Monounsaturated FA          |  | 1.68%                | Copper                     | 21 ppm        |         |
| Fatty acids                       |  | 1.68%                | Cobalt                     | 0.54 ppm      |         |
| Cholesterol                       |  | 75 ppm               | Iodine                     | 1.3 ppm       |         |
| <b>Protein</b>                    |  |                      | <b>15.70%</b>              | Chromium      | 1.2 ppm |
| Arg                               |  | 0.81%                | Selenium                   | 0.31 ppm      |         |
| Cys                               |  | 0.23%                | <b>Vitamins</b>            |               |         |
| Gly                               |  | 0.66%                | Carotene                   | 1.7 ppm       |         |
| His                               |  | 0.39%                | Vitamin K                  | 3.2 ppm       |         |
| Ile                               |  | 0.70%                | Thiamin                    | 8.9 ppm       |         |
| Leu                               |  | 1.44%                | Riboflavin                 | 8.6 ppm       |         |
| Lys                               |  | 0.75%                | Niacin                     | 120 ppm       |         |
| Met                               |  | 0.43%                | Pantothenic Acid           | 61 ppm        |         |
| Phe                               |  | 0.74%                | Chlorine Chloride          | 1,200 ppm     |         |
| Tyr                               |  | 0.47%                | Folic Acid                 | 7.9 ppm       |         |
| Thr                               |  | 0.56%                | Pyridoxine                 | 14 ppm        |         |
| Trp                               |  | 0.18%                | Biotin                     | 0.1 ppm       |         |
| Val                               |  | 0.76%                | B12                        | 73 mcg / kg   |         |
| Ser                               |  | 0.80%                | Vitamin A                  | 20 IU / g     |         |
| Asp                               |  | 1.48%                | Vitamin D                  | 6.6 IU / g    |         |
| Glu                               |  | 3.79%                | Vitamin E                  | 110 IU / kg   |         |
| Ala                               |  | 0.95%                | Ascorbic Acid              | 0.5 mg / g    |         |
| Pro                               |  | 1.43%                |                            |               |         |
| Taurine                           |  | <0.01%               |                            |               |         |
| <b>Total Digestible Nutrients</b> |  | <b>77.60%</b>        | <b>Calories by %</b>       |               |         |
| <b>Gross Energy</b>               |  | <b>4.05 kcal / g</b> | <b>Protein</b>             | <b>18.194</b> |         |
| <b>Physiological Fuel Value</b>   |  | <b>3.45 kcal / g</b> | <b>Fat (ether extract)</b> | <b>13.085</b> |         |
| <b>Metabolizable Energy</b>       |  | <b>3.19 kcal / g</b> | <b>Carbohydrates</b>       | <b>68.721</b> |         |

## Supplementary Table 2. Primate High Fat / Sugar Diet Nutrient Profile

Envigo / Harlan Teklad Primate Diet (27S, 20F): TD.07802

| Macronutrients      |           |          |
|---------------------|-----------|----------|
| <b>Protein</b>      | %         | 16.7775  |
| <b>Carbohydrate</b> | %         | 44.45065 |
| <b>Fat</b>          | %         | 19.975   |
| <b>kcal density</b> | kcal/g    | 4.25     |
| <b>Protein</b>      | % of kcal | 15.8     |
| <b>Carbohydrate</b> | % of kcal | 41.9     |
| <b>Fat</b>          | % of kcal | 42.3     |
| <b>Fiber</b>        | %         | 5        |

| Amino Acids |   |      |
|-------------|---|------|
| <b>Lys</b>  | % | 1.49 |
| <b>Met</b>  | % | 0.43 |
| <b>Cys</b>  | % | 0.38 |
| <b>Arg</b>  | % | 0.54 |
| <b>Phe</b>  | % | 0.69 |
| <b>Tyr</b>  | % | 0.74 |
| <b>His</b>  | % | 0.37 |
| <b>Ile</b>  | % | 0.82 |
| <b>Leu</b>  | % | 1.87 |
| <b>Thr</b>  | % | 0.79 |
| <b>Trp</b>  | % | 0.26 |
| <b>Val</b>  | % | 0.92 |

| Minerals  |       |       |
|-----------|-------|-------|
| <b>Ca</b> | %     | 0.66  |
| <b>P</b>  | %     | 0.44  |
| <b>K</b>  | %     | 0.98  |
| <b>Na</b> | %     | 0.35  |
| <b>Cl</b> | %     | 0.54  |
| <b>Mg</b> | %     | 0.08  |
| <b>Cu</b> | mg/kg | 6.3   |
| <b>Fe</b> | mg/kg | 140.6 |
| <b>Zn</b> | mg/kg | 24    |
| <b>Mn</b> | mg/kg | 24.2  |
| <b>I</b>  | mg/kg | 3.2   |
| <b>Se</b> | mg/kg | 0.07  |
| <b>Cr</b> | mg/kg | 0.63  |

| Vitamins            |       |       |
|---------------------|-------|-------|
| <b>Vit A</b>        | IU/kg | 17890 |
| <b>Vit D</b>        | IU/kg | 2000  |
| <b>Vit E</b>        | IU/kg | 100   |
| <b>Vit K</b>        | mg/kg | 50    |
| <b>Biotin</b>       | mg/kg | 0.4   |
| <b>Choline</b>      | mg/kg | 1148  |
| <b>Folic Acid</b>   | mg/kg | 2     |
| <b>Niacin</b>       | mg/kg | 99.1  |
| <b>Pantothenate</b> | mg/kg | 60.5  |
| <b>Riboflavin</b>   | mg/kg | 22    |
| <b>Thiamin</b>      | mg/kg | 19.6  |
| <b>B-6</b>          | mg/kg | 18.1  |
| <b>B-12</b>         | ug/kg | 0     |
| <b>Vit C</b>        | mg/kg | 1341  |
| <b>PABA</b>         | mg/kg | 110   |

| Lipids             |       |      |
|--------------------|-------|------|
| <b>Cholesterol</b> | mg/kg | 467  |
| <b>SFA</b>         | %     | 11.7 |
| <b>MUFA</b>        | %     | 5.9  |
| <b>PUFA</b>        | %     | 1.8  |
| <b>4:0</b>         | %     | 0.67 |
| <b>6:0</b>         | %     | 0.4  |
| <b>8:0</b>         | %     | 0.19 |
| <b>10:0</b>        | %     | 0.35 |
| <b>11:0</b>        | %     | 0.02 |
| <b>12:0</b>        | %     | 0.54 |
| <b>14:0</b>        | %     | 2.05 |
| <b>16:0</b>        | %     | 4.81 |
| <b>16:1</b>        | %     | 0.33 |
| <b>18:0</b>        | %     | 2.27 |
| <b>18:1</b>        | %     | 5.4  |
| <b>18:2</b>        | %     | 1.57 |
| <b>18:3</b>        | %     | 0.25 |

**Supplementary Table 3.** Food consumption by group.

|             | <b>kcal/day</b> | SEM   | <b>kcal/kg</b> | SEM  |
|-------------|-----------------|-------|----------------|------|
| <b>CON</b>  | <b>687.78</b>   | 91.23 | <b>51.84</b>   | 5.12 |
| <b>HFS</b>  | <b>755.22</b>   | 25.57 | <b>51.13</b>   | 7.4  |
| <b>HFSR</b> | <b>799.5</b>    | 52.84 | <b>51.98</b>   | 4.22 |

**CON:** control diet; **HFS:** high fat/sugar diet; **HFSR:** high fat/sugar diet supplemented with resveratrol
